# Supplementary material for: Diesel exhaust rapidly degrades floral odours used by honeybees
Source: PubMed Central journal article supplement — Sci Rep. 2013 Oct 3;3:2779. doi: 10.1038/srep02779 (PMC3789406; doi:10.1038/srep02779), 2013-10-03
Supplement: srep02779-s1.pdf [file srep02779-s1.pdf]

## Supplementary Information

### Diesel exhaust rapidly degrades floral odours used by honeybees

Robbie D. Girling<sup>1\*</sup>, Inka Lusebrink<sup>1\*</sup>, Emily Farthing<sup>1</sup>, Tracey A. Newman<sup>2</sup> & Guy M.

Poppy<sup>1</sup>

### Supplementary Tables

**Supplementary Table 1** | Percentage constituents of the synthetic floral blend and their vapour pressures; ratios are based upon the natural emission rates identified from oilseed rape flowers by Blight et al.<sup>20</sup>

| Floral chemical                     | %    | Vapour pressure<br>(mm Hg <sup>-1</sup> at 25 °C) | Purity<br>(%) | Supplier      |
|-------------------------------------|------|---------------------------------------------------|---------------|---------------|
| $\alpha$ -pinene                    | 8.83 | 4.7500                                            | 98            | Sigma Aldrich |
| 3-carene                            | 0.83 | 3.7200                                            | $\geq 98$     | Sigma Aldrich |
| $\alpha$ -terpinene                 | 0.83 | 1.6380                                            | $\geq 95$     | Sigma Aldrich |
| <i>p</i> -cymene                    | 2.92 | 1.4600                                            | 99            | Sigma Aldrich |
| linalool                            | 9.58 | 0.0905                                            | 97            | Sigma Aldrich |
| phenylacetaldehyde                  | 0.83 | 0.3680                                            | $\geq 90$     | Sigma Aldrich |
| ( <i>E,E</i> )- $\alpha$ -farnesene | 72.5 | 0.0067                                            | n.a.          | Contech       |
| 2-phenylethanol                     | 4.17 | 0.0740                                            | n.a.          | Sigma Aldrich |

Sigma Aldrich (St. Louis, MO, USA); Contech (Victoria, BC, Canada)

**Supplementary Table 2** | Mean abundances (x 1000; ± s.e.m) from gas-chromatography mass-spectrometry analyses of the constituents of the synthetic floral blend, exposed to ambient ‘clean’ air or diesel exhaust polluted air at four different time points post exposure ( $n = 5$ ).

| Floral chemical     | Time (min) | Ambient Air |           |           |           | Diesel Exhaust |           |           |            |
|---------------------|------------|-------------|-----------|-----------|-----------|----------------|-----------|-----------|------------|
|                     |            | 1           | 30        | 60        | 120       | 1              | 30        | 60        | 120        |
| $\alpha$ -pinene    |            | 948 ± 36    | 539 ± 39  | 449 ± 29  | 411 ± 28  | 845 ± 38       | 558 ± 25  | 472 ± 20  | 436 ± 16   |
| 3-carene            |            | 554 ± 13    | 494 ± 22  | 406 ± 19  | 363 ± 22  | 492 ± 11       | 511 ± 23  | 431 ± 19  | 386 ± 13   |
| $\alpha$ -terpinene |            | 305 ± 24    | 322 ± 35  | 259 ± 29  | 223 ± 25  | -              | -         | -         | -          |
| <i>p</i> -cymene    |            | 1046 ± 41   | 1327 ± 38 | 1128 ± 38 | 1014 ± 43 | 1085 ± 38      | 1461 ± 74 | 1283 ± 55 | 1136 ± 43  |
| linalool            |            | 380 ± 21    | 2369 ± 62 | 2782 ± 24 | 2768 ± 40 | 308 ± 36       | 1851 ± 45 | 2272 ± 88 | 2288 ± 145 |
| phenylacetaldehyde  |            | 39 ± 11     | 178 ± 36  | 231 ± 43  | 253 ± 37  | 23 ± 7         | 125 ± 18  | 143 ± 20  | 133 ± 18   |
| $\alpha$ -farnesene |            | 36 ± 5      | 421 ± 27  | 725 ± 39  | 1081 ± 82 | -              | -         | -         | -          |
| 2-phenylethanol     |            | 165 ± 9     | 1201 ± 56 | 1573 ± 57 | 1585 ± 83 | 113 ± 14       | 633 ± 14  | 824 ± 31  | 909 ± 43   |

**Supplementary Table 3** | Statistical comparisons of mean abundances of the constituents of the synthetic floral blend, exposed to ambient ‘clean’ air or diesel exhaust polluted air at four different time points post exposure. Data that were normally distributed for each chemical at each time point were compared by *t*-tests, those that were not normally distributed were compared by Mann-Whitney U tests.

| Floral chemical     | Time (min) | 1              |              | 30             |                  | 60             |                  | 120            |              |
|---------------------|------------|----------------|--------------|----------------|------------------|----------------|------------------|----------------|--------------|
|                     |            | Test statistic | P            | Test statistic | P                | Test statistic | P                | Test statistic | P            |
| $\alpha$ -pinene    |            | $t = 1.967$    | 0.085        | $t = 0.398$    | 0.701            | $t = 0.668$    | 0.523            | $t = 0.762$    | 0.468        |
| 3-carene            |            | $Z = 2.611$    | <b>0.008</b> | $t = 0.551$    | 0.597            | $Z = 0.940$    | 0.421            | $Z = 1.149$    | 0.310        |
| $\alpha$ -terpinene |            | -              | -            | -              | -                | -              | -                | -              | -            |
| <i>p</i> -cymene    |            | $Z = 0.522$    | 0.690        | $Z = 1.567$    | 0.151            | $t = 2.302$    | <b>0.050</b>     | $t = 2.014$    | 0.079        |
| linalool            |            | $t = 1.722$    | 0.123        | $t = 6.756$    | <b>&lt;0.001</b> | $t = 5.607$    | <b>0.001</b>     | $Z = 1.776$    | 0.095        |
| phenylacetaldehyde  |            | $t = 1.278$    | 0.237        | $t = 1.332$    | 0.220            | $t = 1.853$    | 0.101            | $t = 2.902$    | <b>0.020</b> |
| $\alpha$ -farnesene |            | -              | -            | -              | -                | -              | -                | -              | -            |
| 2-phenylethanol     |            | $t = 3.207$    | <b>0.012</b> | $t = 9.782$    | <b>&lt;0.001</b> | $t = 11.568$   | <b>&lt;0.001</b> | $Z = 2.611$    | <b>0.008</b> |

**Supplementary Table 4** | Statistical comparisons of mean abundances of the constituents of the synthetic floral blend, exposed to ambient ‘clean’ air or a **10:1** ratio of NO:NO<sub>2</sub> with NO at either 10, 1 or 0.1 ppm. Data that were normally distributed for each chemical at each time point were compared by *t*-tests, those that were not normally distributed were compared by Mann-Whitney U tests.

| Floral chemical     | NO concentration | 10 ppm            |                  | 1 ppm             |                  | 0.1 ppm           |                  |
|---------------------|------------------|-------------------|------------------|-------------------|------------------|-------------------|------------------|
|                     |                  | Test statistic    | P                | Test statistic    | P                | Test statistic    | P                |
| <i>α</i> -pinene    |                  | <i>t</i> = 5.746  | <b>0.001</b>     | <i>t</i> = 5.952  | <b>0.001</b>     | <i>t</i> = 4.600  | <b>0.004</b>     |
| 3-carene            |                  | <i>Z</i> = 2.309  | <b>0.029</b>     | <i>Z</i> = 2.309  | <b>0.029</b>     | <i>Z</i> = 2.309  | <b>0.029</b>     |
| <i>α</i> -terpinene |                  | <i>t</i> = 25.394 | <b>&lt;0.001</b> | <i>t</i> = 5.849  | <b>0.001</b>     | <i>t</i> = 8.476  | <b>&lt;0.001</b> |
| <i>p</i> -cymene    |                  | <i>t</i> = 5.383  | <b>0.002</b>     | <i>t</i> = 4.548  | <b>0.004</b>     | <i>t</i> = 6.418  | <b>0.001</b>     |
| linalool            |                  | <i>t</i> = 5.007  | <b>0.005*</b>    | <i>Z</i> = 1.155  | 0.343            | <i>Z</i> = 0.577  | 0.686            |
| phenylacetaldehyde  |                  | <i>Z</i> = 2.309  | <b>0.029</b>     | <i>t</i> = 10.469 | <b>&lt;0.001</b> | <i>t</i> = 19.940 | <b>&lt;0.001</b> |
| <i>α</i> -farnesene |                  | <i>t</i> = 6.875  | <b>&lt;0.001</b> | <i>t</i> = 2.486  | <b>0.047</b>     | <i>t</i> = 0.717  | 0.500            |
| 2-phenylethanol     |                  | <i>t</i> = 7.606  | <b>&lt;0.001</b> | <i>t</i> = 2.149  | 0.075            | <i>t</i> = 2.254  | 0.065            |

\*equality of variances not assumed

**Supplementary Table 5** | Statistical comparisons of mean abundances of the constituents of the synthetic floral blend, exposed to ambient ‘clean’ air or a **1:1** ratio of NO:NO<sub>2</sub> with NO at either 10, 1 or 0.1 ppm. Data that were normally distributed for each chemical at each time point were compared by *t*-tests, those that were not normally distributed were compared by Mann-Whitney U tests.

| Floral chemical     | NO concentration | 10 ppm            |                  | 1 ppm             |                   | 0.1 ppm           |                  |
|---------------------|------------------|-------------------|------------------|-------------------|-------------------|-------------------|------------------|
|                     |                  | Test statistic    | P                | Test statistic    | P                 | Test statistic    | P                |
| <i>α</i> -pinene    |                  | <i>t</i> = 11.160 | <b>&lt;0.001</b> | <i>t</i> = 12.324 | <b>&lt;0.001*</b> | <i>t</i> = 9.694  | <b>0.001*</b>    |
| 3-carene            |                  | <i>Z</i> = 2.309  | <b>0.029</b>     | <i>Z</i> = 2.309  | <b>0.029</b>      | <i>Z</i> = 2.309  | <b>0.029</b>     |
| <i>α</i> -terpinene |                  | -                 | -                | <i>t</i> = 8.133  | <b>0.003*</b>     | <i>t</i> = 16.076 | <b>&lt;0.001</b> |
| <i>p</i> -cymene    |                  | <i>t</i> = 19.321 | <b>&lt;0.001</b> | <i>t</i> = 13.555 | <b>0.001*</b>     | <i>t</i> = 5.616  | <b>0.011*</b>    |
| linalool            |                  | <i>t</i> = 0.133  | 0.898            | <i>t</i> = 2.963  | <b>0.025</b>      | <i>t</i> = 0.531  | 0.627*           |
| phenylacetaldehyde  |                  | <i>t</i> = 23.326 | <b>&lt;0.001</b> | <i>t</i> = 23.235 | <b>&lt;0.001</b>  | <i>Z</i> = 2.309  | <b>0.029</b>     |
| <i>α</i> -farnesene |                  | <i>t</i> = 8.918  | <b>&lt;0.001</b> | <i>Z</i> = 2.309  | <b>0.029</b>      | <i>t</i> = 3.894  | <b>0.008</b>     |
| 2-phenylethanol     |                  | <i>t</i> = 4.368  | <b>0.005</b>     | <i>t</i> = 2.865  | <b>0.029</b>      | <i>t</i> = 5.114  | <b>0.002</b>     |

\*equality of variances not assumed

## Supplementary data

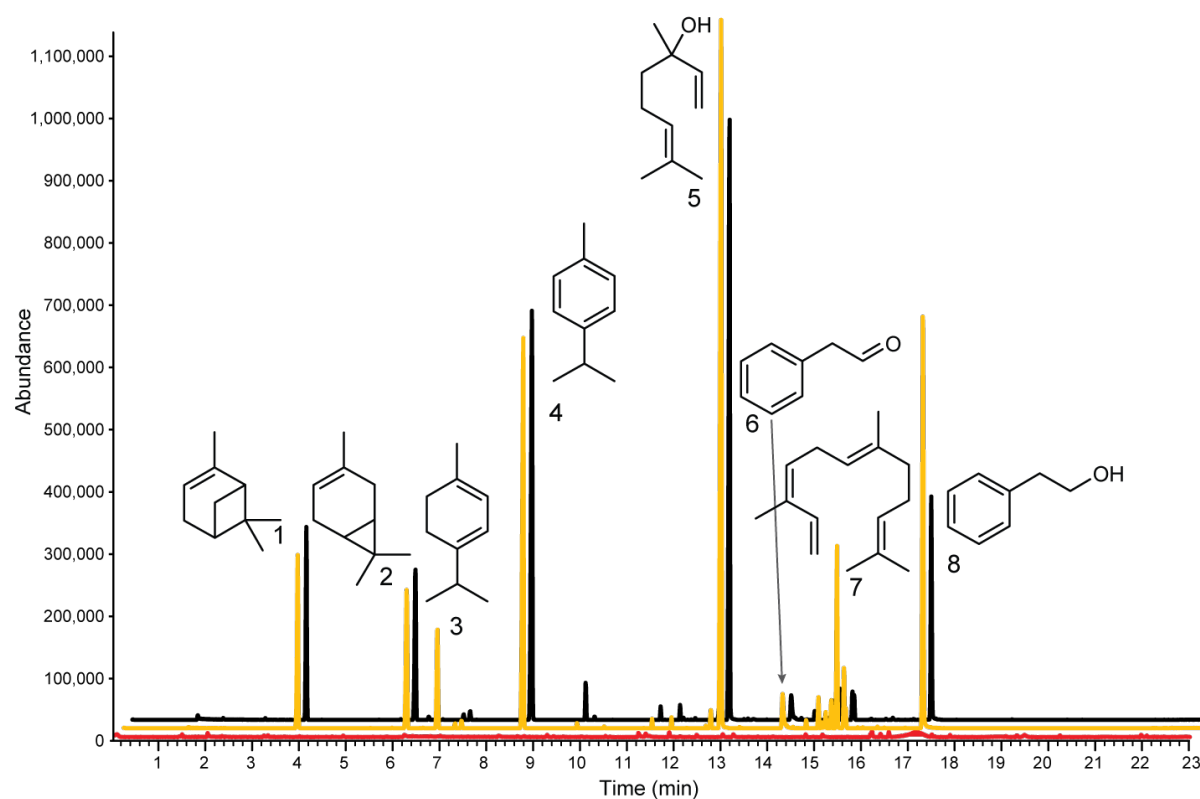

**Supplementary Figure 1 | Total ion current chromatogram.** Diesel exhaust polluted air (red line) in the mass ratio scanned showed no components likely to cause interference with or be mistaken for the floral chemicals used in the subsequent experiments. The constituents of the synthetic floral blend, exposed to diesel exhaust polluted air (black line) or ambient 'clean' air (yellow line): 1)  $\alpha$ -pinene; 2) 3-carene; 3)  $\alpha$ -terpinene; 4) *p*-cymene; 5) linalool; 6) phenylacetaldehyde; 7)  $\alpha$ -farnesene; 8) 2-phenylethanol. Recordings were made after an exposure time of 30 min.

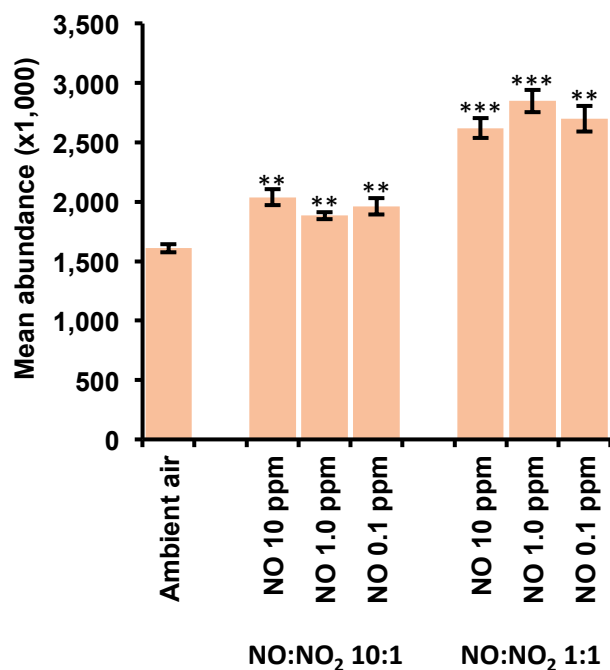

**Supplementary Figure 2 | Mean abundance of  $\alpha$ -pinene (x 1000;  $\pm$  s.e.m) from gas-chromatography mass-spectrometry analyses, when exposed to ambient ‘clean’ air or a variety of concentrations and ratios of NO and NO<sub>2</sub> ( $n = 4$ ). Asterisks denote significance of difference in comparisons with ambient air (\*\* P < 0.01, \*\*\* P < 0.001).**

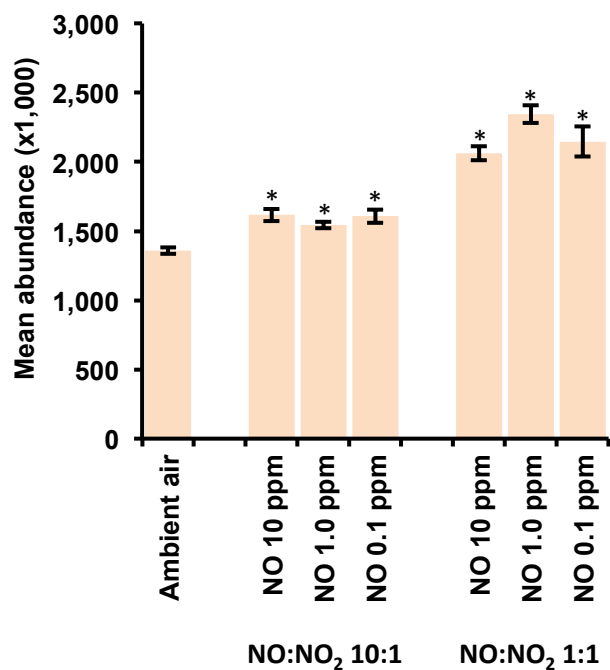

**Supplementary Figure 3 | Mean abundance of 3-carene (x 1000;  $\pm$  s.e.m)** from gas-chromatography mass-spectrometry analyses, when exposed to ambient ‘clean’ air or a variety of concentrations and ratios of NO and NO<sub>2</sub> ( $n = 4$ ). Asterisks denote significance of difference in comparisons with ambient air (\*  $P < 0.05$ ).

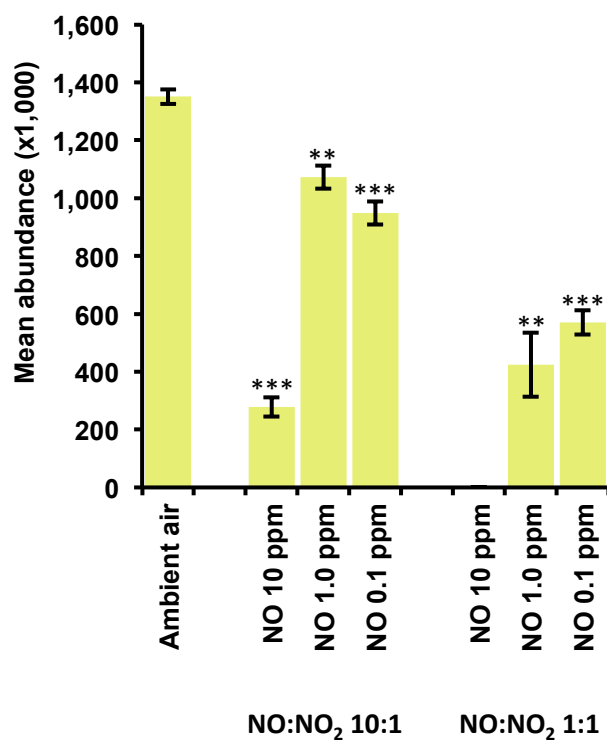

**Supplementary Figure 4 | Mean abundance of  $\alpha$ -terpinene (x 1000;  $\pm$  s.e.m) from gas-chromatography mass-spectrometry analyses, when exposed to ambient ‘clean’ air or a variety of concentrations and ratios of NO and NO<sub>2</sub> ( $n = 4$ ). Asterisks denote significance of difference in comparisons with ambient air (\*\*  $P < 0.01$ , \*\*\*  $P < 0.001$ ).**

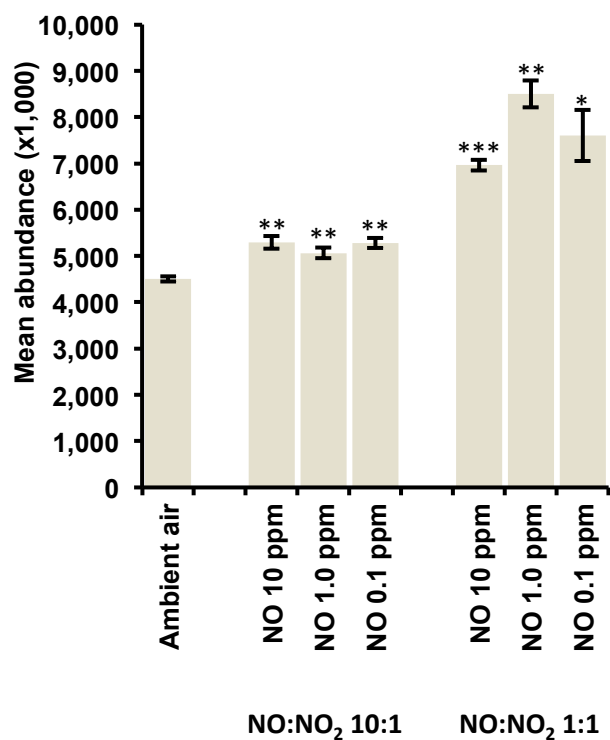

**Supplementary Figure 5 | Mean abundance of *p*-cymene (x 1000;  $\pm$  s.e.m) from gas-chromatography mass-spectrometry analyses, when exposed to ambient ‘clean’ air or a variety of concentrations and ratios of NO and NO<sub>2</sub> ( $n = 4$ ). Asterisks denote significance of difference in comparisons with ambient air (\*  $P < 0.05$ , \*\*  $P < 0.01$ , \*\*\*  $P < 0.001$ ).**



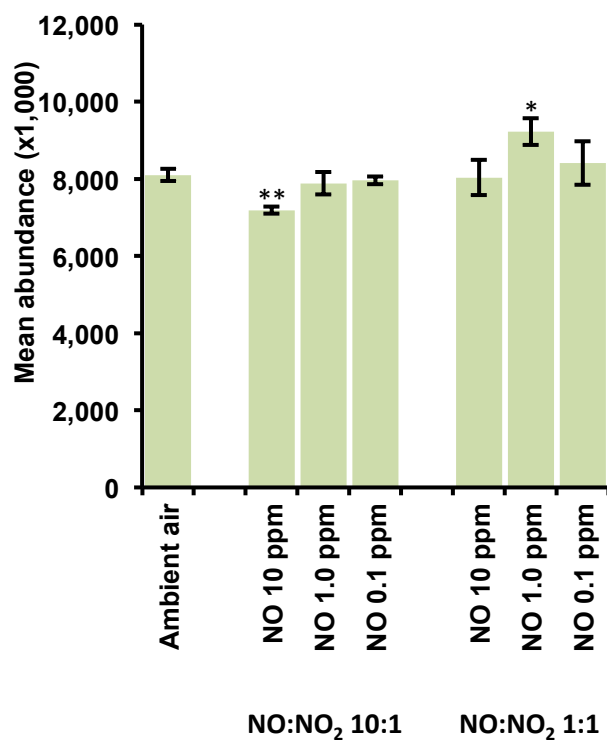

**Supplementary Figure 6 | Mean abundance of linalool (x 1000; ± s.e.m) from gas-chromatography mass-spectrometry analyses, when exposed to ambient ‘clean’ air or a variety of concentrations and ratios of NO and NO<sub>2</sub> (*n* = 4). Asterisks denote significance of difference in comparisons with ambient air (\* *P* < 0.05, \*\* *P* < 0.01).**

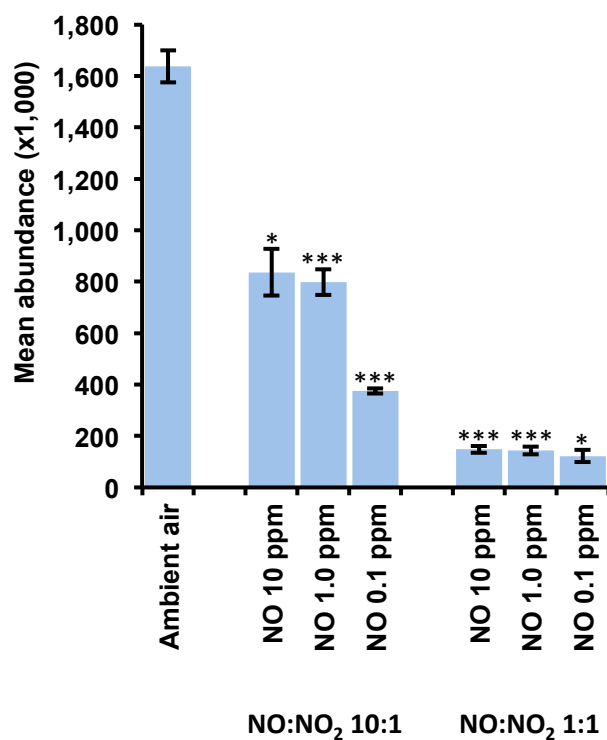

**Supplementary Figure 7 | Mean abundance of phenylacetaldehyde (x 1000;  $\pm$  s.e.m)** from gas-chromatography mass-spectrometry analyses, when exposed to ambient ‘clean’ air or a variety of concentrations and ratios of NO and NO<sub>2</sub> ( $n = 4$ ). Asterisks denote significance of difference in comparisons with ambient air (\*  $P < 0.05$ , \*\*\*  $P < 0.001$ ).

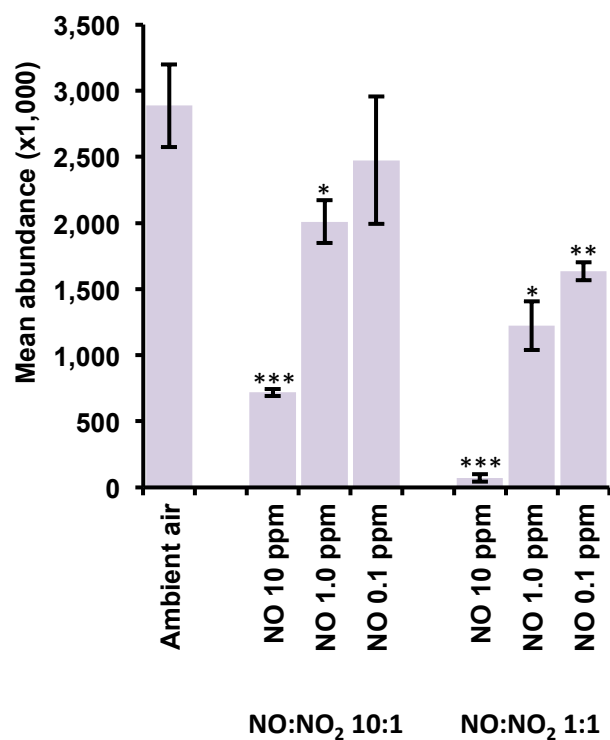

**Supplementary Figure 8 | Mean abundance of  $\alpha$ -farnesene (x 1000;  $\pm$  s.e.m) from gas-chromatography mass-spectrometry analyses, when exposed to ambient ‘clean’ air or a variety of concentrations and ratios of NO and NO<sub>2</sub> ( $n = 4$ ). Asterisks denote significance of difference in comparisons with ambient air (\*  $P < 0.05$ , \*\*  $P < 0.01$ , \*\*\*  $P < 0.001$ ).**

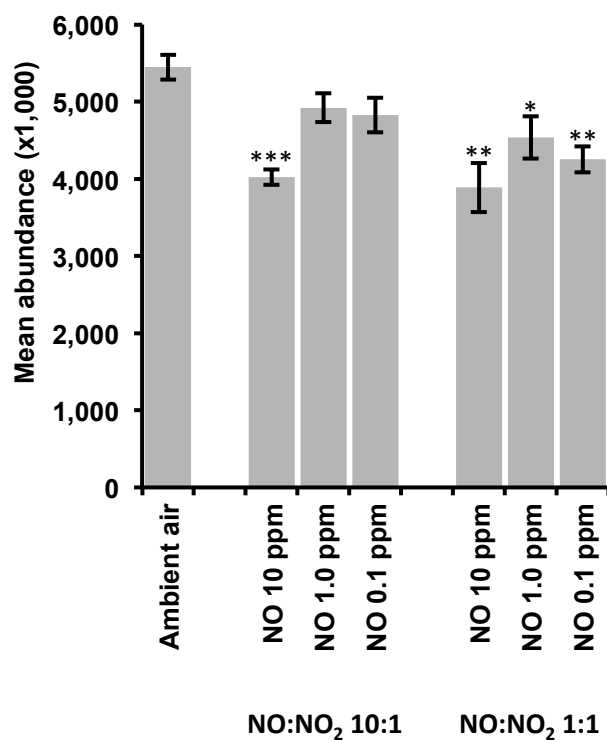

**Supplementary Figure 9 | Mean abundance of 2-phenylethanol (x 1000; ± s.e.m)** from gas-chromatography mass-spectrometry analyses, when exposed to ambient ‘clean’ air or a variety of concentrations and ratios of NO and NO<sub>2</sub> (*n* = 4). Asterisks denote significance of difference in comparisons with ambient air (\* *P* < 0.05, \*\* *P* < 0.01, \*\*\* *P* < 0.001).
